# Supplementary material for: Pancreatic Neuroendocrine Tumors and EMT Behavior Are Driven by the CSC Marker DCLK1
Source: Oxford University Press journal article supplement (doi:10.1158/1541-7786.mcr-16-0285), 2017-02-08
Supplement: 15417786mcr160285-sup-170805_2_supp_3976692_vvvrvd.doc [file 15417786mcr160285-sup-170805_2_supp_3976692_vvvrvd.doc]

**SUPPLEMENTARY FIGURE LEGENDS**

Supplementary Figure 1S. Negative control for immunohistochemistry. Rabbit IgG (Santa Cruz Biotechnology, CA; Cat. #sc-2027) was used in place of the primary antibody for DCLK1.

Supplementary Figure 2S. Comparison of DCLK1 immunostaining scores between primary PNETs and metastatic sites (lymph nodes) in four cases. n.s., not significant.

Supplementary Figure 3S. Expression of DCLK1 in primary liver NET (LNET) tissues. DCLK1 is expressed as a full-length isoform (82 kDa) in LNET tissues (A). NT indicates non-tumorous liver tissue surrounding the tumor (T). The used antibody reacts with DCLK1 in LNET tissues obtained from four patients (Case 1-4) (B). Strong and diffuse expression of DCLK1 is observed in LNET tissues. Surrounding hepatocytes (arrow in Case 1) are negative for the expression.

Supplementary Figure 4S. cDNA microarray analysis to compare DCLK1-overexpressing QGP1 cells (DCLK1) with empty vector-transfected control cells (EV).

Supplementary Figure 5S. Sphere formation assay. (A) The area of the cell spheres is measured using a microscope equipped with digital cell counting software (left panels, phase-contrast images; right, digital images). (B) Graph shows significantly larger area/well in QGP1-DCLK1 cells than control cells. ※, p < 0.01, Mann-Whitney U test.
